# Supplementary material for: Evolutionarily conserved structural changes in phosphatidylinositol 5-phosphate 4-kinase (PI5P4K) isoforms are responsible for differences in enzyme activity and localization
Source: PubMed Central journal article supplement (PMC3749867; doi:10.1042/bj20130488), 2013-07-26
Supplement: bj4540049add.pdf [file bj4540049add.pdf]

## SUPPLEMENTARY ONLINE DATA

# Evolutionarily conserved structural changes in phosphatidylinositol 5-phosphate 4-kinase (PI5P4K) isoforms are responsible for differences in enzyme activity and localization

Jonathan H. CLARKE<sup>1</sup> and Robin F. IRVINE

Department of Pharmacology, Tennis Court Road, Cambridge CB2 1PD, U.K.

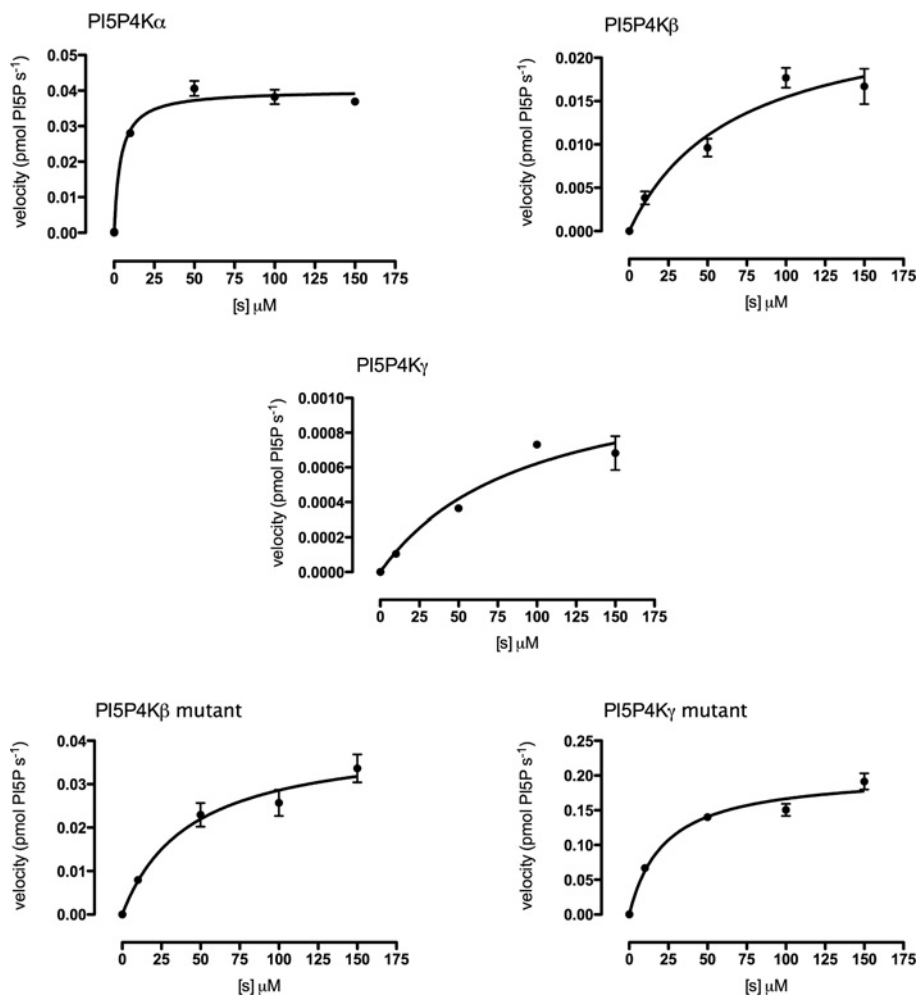

**Figure S1 Saturation curves for PI5P4K enzyme activity assays at different ATP substrate concentrations**

Experiments were conducted with a minimum of triplicate samples. Mutant PI5P4K $\beta$  and PI5P4K $\gamma$  enzymes refer to constructs mutagenized to increase the intrinsic activity of the isoform (see the Experimental section and Figure 2 of the main text). Results are means  $\pm$  S.E.M.

<sup>1</sup> To whom correspondence should be addressed (email jhc30@cam.ac.uk).

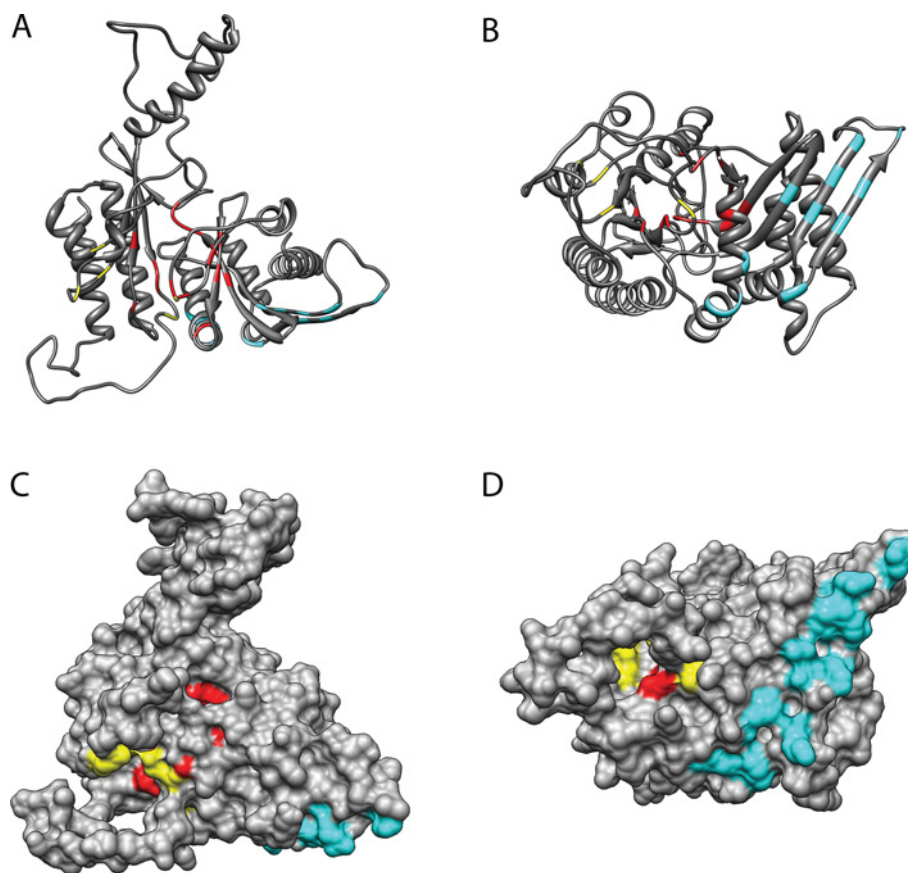

**Figure S2 Models of PI5P4K $\beta$  indicating key structural amino acids**

Ribbon (A and B) and space-filling (C and D) models of PI5P4K $\beta$  with amino acid residues suggested to be important in ATP binding (red), PtdIns5P binding (yellow) and membrane interaction (cyan). Side views (A and C) and membrane-binding views (B and D) are shown. Data were extracted from [1]. Models were compiled using the UCSF Chimera package.

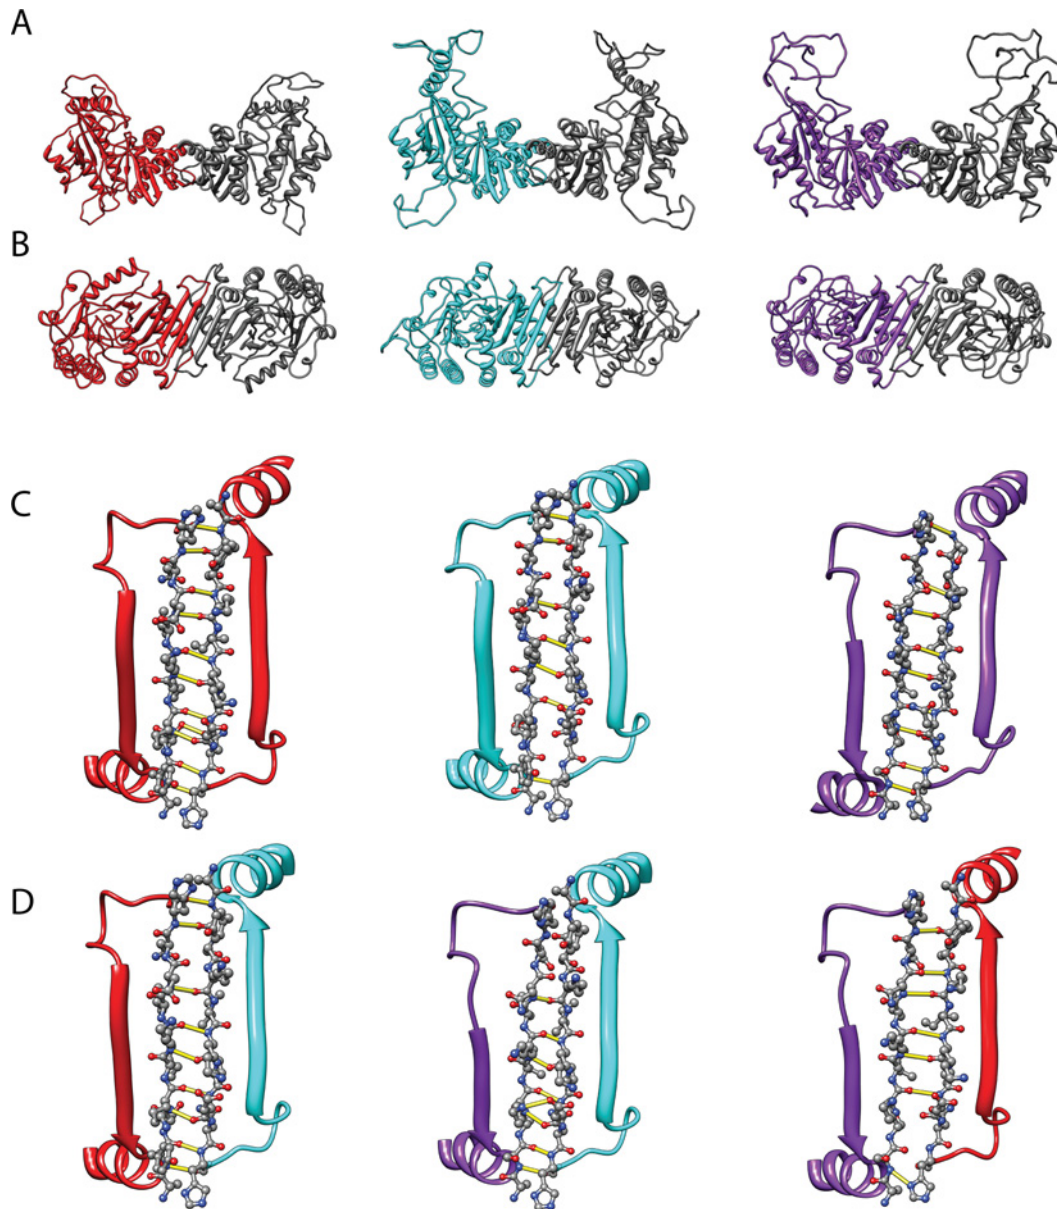

**Figure S3 Predicted full structures of PI5P4Ks**

(**A** and **B**) Amino-acid sequence and X-ray crystallography structures of all three isoforms were used to model the unordered regions and suggest possible conformations. The structures are presented as homodimers with one monomer coloured (PIP4K $\alpha$ , red; PIP4K $\beta$ , cyan; and PIP4K $\gamma$ , purple) and dimers are positioned to view the side elevation (**A**) and the flat surface that would be in contact with a membrane (**B**). (**C** and **D**) Dimerization interfaces for PI5P4K homo- and hetero-dimers. Fragments shown represent the  $\beta$ 1 sheet interface (molecular view) attached to the  $\beta$ 2 sheet region (ribbon view), with predicted hydrogen bonding shown in yellow. Bonding across the homodimer interfaces is predicted from the published structures (**C**) and predictions of heterodimerization interfaces were generated by superimposing the structure for the first 120 amino acids of an isoform on to one chain of the homodimer crystal structure of the pairing isoform and identifying the comparative hydrogen bond lengths using the FindHBond function of Chimera (**D**).

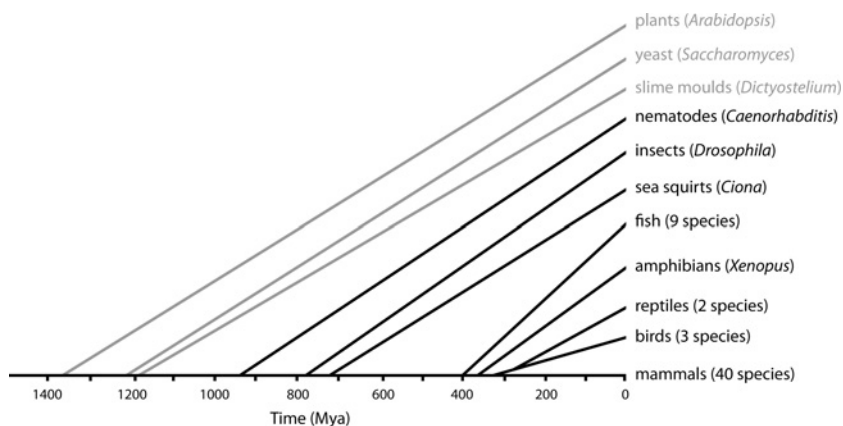

**Figure S4 Evolutionary divergence of species with annotated PI4P5K/PI5P4K superfamily genes, relative to mammalian evolution**

Groups denote taxa with only PI4P5K activity (light shading) and taxa with at least one PI5P4K activity (dark shading), as defined by gene sequence homology. The presence of genes in other lower metazoa (not annotated) has not been included (see Table S4). Timescale represents millions of years (since present). Values for estimated divergence of taxa expressing PI5P4K activity were estimated using TimeTree [2].

**Table S1 Example turnover numbers from the BRENDA enzyme database**

The examples show the maximum and minimum range of all known enzymes and also specifically of kinases. The  $k_{cat}$  values reported are for wild-type human enzymes utilizing natural substrates.

| Enzyme                                     | $k_{cat}$ ( $s^{-1}$ ) |
|--------------------------------------------|------------------------|
| Histone-arginine N-methyltransferase       | $2.0 \times 10^{-6}$   |
| Neutrophil collagenase                     | $2.3 \times 10^{-4}$   |
| Calpain-1                                  | $2.0 \times 10^{-2}$   |
| Alcohol dehydrogenase                      | 2.5                    |
| Deoxyribonuclease I                        | 703                    |
| Cholinesterase                             | 1433                   |
| Carbonic anhydratase II                    | $1.4 \times 10^6$      |
| Ethanolamine kinase                        | $1.6 \times 10^{-4}$   |
| Polo kinase                                | $9.4 \times 10^{-3}$   |
| Thiamine diphosphokinase                   | $6.9 \times 10^{-2}$   |
| Mitogen-activated protein kinase           | 0.9                    |
| Diacylglycerol kinase                      | 1.7                    |
| Ins(1,3,4) $P_3$ 5/6-kinase                | 20                     |
| Diphosphoinositol-pentakisphosphate kinase | 38                     |
| Choline kinase                             | 71.5                   |
| Creatine kinase                            | 143                    |
| Adenylate kinase                           | 842                    |
| Phosphoglycerate kinase                    | 2633                   |

**Table S2 Regions of amino acids relating to structural variations in aligned models**

Region 1 is synonymous with the putative G-loop sequence, region 2 with the variable insert sequence and region 3 with the activation loop, as designated in the PI5P4K $\beta$  structure [1].

| Region   | PI5P4K $\alpha$ | PI5P4K $\beta$ | PI5P4K $\gamma$ |
|----------|-----------------|----------------|-----------------|
| Region 1 | 125–133         | 130–138        | 133–140         |
| Region 2 | 284–332         | 289–342        | 291–347         |
| Region 3 | 363–387         | 372–397        | 378–402         |

**Table S3 Evidence for PI5P4K activity in metazoan genomes**

A BLAST search of the EnsemblMetazoa genomes using the dPIP4K peptide sequence from *D. melanogaster* (bold) matched regions of genomes from other species, suggesting that at least one similar sequence is present. Using *D. melanogaster* as a search control, the best percentage identity scores are reported over the largest alignment length. Species below the parasitoid wasp have ambiguity over the presence of a potential PI5P4K activity. The presence of regions of translated protein identity does not confirm the presence of a functional activity in these species. BLAST searches of the EnsemblPlants, EnsemblFungi, EnsemblProtists and EnsemblBacteria genome databases did not produce any matches greater than 35%, 40%, 34% or 29% identity respectively.

| Common name             | Latin name                            | Identity (%) | Length of alignment |
|-------------------------|---------------------------------------|--------------|---------------------|
| <b>Fruittfly</b>        | <b><i>Drosophila melanogaster</i></b> | <b>100</b>   | <b>404</b>          |
| Red flour beetle        | <i>Tribolium castaneum</i>            | 72           | 415                 |
| Human louse             | <i>Pediculus humanus</i>              | 73           | 394                 |
| Waterflea               | <i>Daphnia pulex</i>                  | 65           | 331                 |
| European honeybee       | <i>Apis mellifera</i>                 | 65           | 307                 |
| Nematode                | <i>Trichinella spiralis</i>           | 50           | 321                 |
| Monarch butterfly       | <i>Danaus plexippus</i>               | 68           | 298                 |
| Silkmoth                | <i>Bombyx mori</i>                    | 62           | 299                 |
| Pea aphid               | <i>Acyrtosiphon pisum</i>             | 60           | 423                 |
| Trichoplax              | <i>Trichoplax adhaerens</i>           | 47           | 404                 |
| Trematode               | <i>Schistosoma mansoni</i>            | 49           | 402                 |
| Nematode                | <i>Caenorhabditis elegans</i>         | 53           | 411                 |
| Deer tick               | <i>Ixodes scapularis</i>              | 58           | 372                 |
| Starlet sea anenome     | <i>Nematostella vectensis</i>         | 57           | 319                 |
| Purple sea urchin       | <i>Strongylocentrotus purpuratus</i>  | 46           | 337                 |
| Leafcutter ant          | <i>Atta cephalotes</i>                | 58           | 247                 |
| Nematode                | <i>Pristionchus pacificus</i>         | 61           | 104                 |
| Parasitoid wasp         | <i>Nasonia vitripennis</i>            | 96           | 33                  |
| Southern house mosquito | <i>Culex quinquefasciatus</i>         | 31           | 279                 |
| Yellow fever mosquito   | <i>Aedes aegypti</i>                  | 31           | 279                 |
| Sponge                  | <i>Amphimedon queenslandica</i>       | 40           | 205                 |
| Mosquito                | <i>Anopheles gambiae</i>              | 28           | 214                 |
| Postman butterfly       | <i>Heliconius melpomene</i>           | 36           | 197                 |

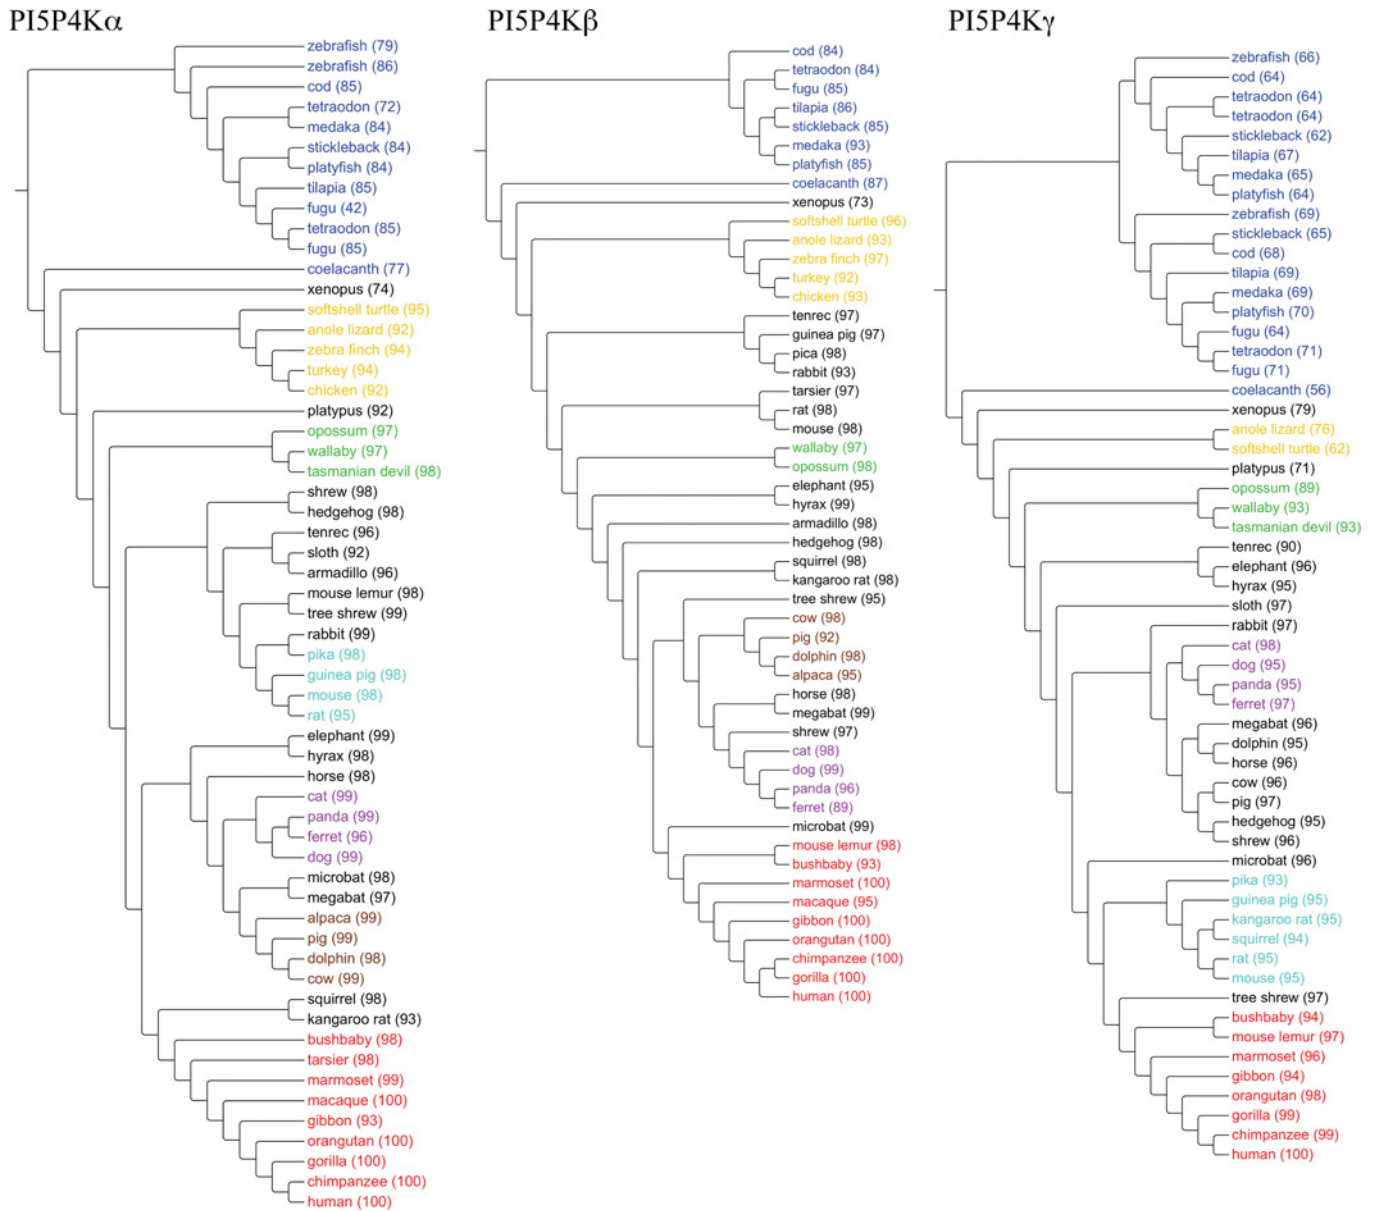

**Figure S5 Molecular evolution of PI5P4K isoforms**

Cladograms were created from phylograms (generated using the EnsemblCompara GeneTrees resource) to depict evolutionary divergence of PI5P4Ks in sequenced genomes. Numbers in parentheses represent percentage identity between orthologues. Scores were calculated from ClustalW pairwise alignments (using the BLOSUM sequence identity matrix) over regions of (partial) sequence available [3]. Coloured groups indicate related taxa (red, primates; brown, cetaceans and ungulates; purple, carnivores; cyan, rodents; green, marsupials; yellow, reptiles and birds; blue, fish).

**Table S4 Annotated PI5P4K genes in vertebrate genomes**

The search was limited to complete sequenced genomes available on the Ensembl (EMBL-EBI) database using gene name and orthologue searches. The available genomes were current as of 1 January 2013.

| PIP4K2A gene(s) | PIP4K2B gene(s) | PIP4K2C gene(s) | Common name                 | Latin name                        | Class, order                       |
|-----------------|-----------------|-----------------|-----------------------------|-----------------------------------|------------------------------------|
| 2               | 0               | 2               | Zebrafish                   | <i>Danio rerio</i>                | Actinopterygii, Cypriniformes      |
| 1               | 1               | 2               | Platyfish                   | <i>Xiphophorus maculatus</i>      | Actinopterygii, Cyprinodontiformes |
| 1               | 1               | 2               | Medaka (Japanese killifish) | <i>Oryzias latipes</i>            | Actinopterygii, Belontiiformes     |
| 1               | 1               | 2               | Stickleback                 | <i>Gasterosteus aculeatus</i>     | Actinopterygii, Gasterosteiformes  |
| 2               | 1               | 2               | Pufferfish                  | <i>Takifugu rubripes</i>          | Actinopterygii, Tetraodontiformes  |
| 2               | 1               | 3               | Green-spotted pufferfish    | <i>Tetraodon nigroviridis</i>     | Actinopterygii, Tetraodontiformes  |
| 1               | 1               | 2               | Tilapia                     | <i>Oreochromis niloticus</i>      | Actinopterygii, Perciformes        |
| 1               | 1               | 2               | Cod                         | <i>Gadus morhua</i>               | Actinopterygii, Gadiformes         |
| 1               | 1               | 1               | Coelacanth                  | <i>Latimeria chalumnae</i>        | Sarcopterygii, Coelacanthiformes   |
| 1               | 1               | 1               | Western clawed frog         | <i>Xenopus tropicalis</i>         | Amphibia, Anura                    |
| 1               | 1               | 1               | Chinese softshell turtle    | <i>Pelodiscus sinensis</i>        | Sauropsida, Testudines             |
| 1               | 1               | 1               | Anole lizard                | <i>Anolis carolinensis</i>        | Reptilia, Squamata                 |
| 1               | 1               | 0               | Turkey                      | <i>Meleagris gallopavo</i>        | Aves, Galliformes                  |
| 1               | 1               | 0               | Chicken                     | <i>Gallus gallus</i>              | Aves, Galliformes                  |
| 1               | 1               | 0               | Zebra finch                 | <i>Taeniopygia guttata</i>        | Aves, Passeriformes                |
| 1               | 1               | 1               | Platypus                    | <i>Ornithorhynchus anatinus</i>   | Mammalia, Monotremata              |
| 1               | 0               | 1               | Tasmanian devil             | <i>Sarcophilus harrisii</i>       | Mammalia, Marsupialia              |
| 1               | 1               | 1               | Wallaby                     | <i>Macropus eugenii</i>           | Mammalia, Marsupialia              |
| 1               | 1               | 1               | Opossum                     | <i>Monodelphis domestica</i>      | Mammalia, Didelphimorphia          |
| 1               | 0               | 1               | Sloth                       | <i>Choloepus hoffmanni</i>        | Mammalia, Pilosa                   |
| 1               | 1               | 0               | Armadillo                   | <i>Dasybus novemcinctus</i>       | Mammalia, Cingulata                |
| 1               | 1               | 1               | Lesser hedgehog tenrec      | <i>Echinops telfairi</i>          | Mammalia, Afrosoricida             |
| 1               | 1               | 1               | Hyrax                       | <i>Procavia capensis</i>          | Mammalia, Hyracoidea               |
| 1               | 1               | 1               | Elephant                    | <i>Loxodonta africana</i>         | Mammalia, Proboscidea              |
| 1               | 1               | 1               | Shrew                       | <i>Sorex araneus</i>              | Mammalia, Soricomorpha             |
| 1               | 1               | 1               | Hedgehog                    | <i>Erinaceus europaeus</i>        | Mammalia, Erinaceomorpha           |
| 1               | 1               | 1               | Megabat                     | <i>Pteropus vampyrus</i>          | Mammalia, Chiroptera               |
| 1               | 1               | 1               | Microbat                    | <i>Myotis lucifugus</i>           | Mammalia, Chiroptera               |
| 1               | 1               | 1               | Ferret                      | <i>Mustela putorius furo</i>      | Mammalia, Carnivora                |
| 1               | 1               | 1               | Dog                         | <i>Canis familiaris</i>           | Mammalia, Carnivora                |
| 1               | 1               | 1               | Panda                       | <i>Ailuropoda melanoleuca</i>     | Mammalia, Carnivora                |
| 1               | 1               | 1               | Cat                         | <i>Felis catus</i>                | Mammalia, Carnivora                |
| 1               | 1               | 1               | Horse                       | <i>Equus caballus</i>             | Mammalia, Perissodactyla           |
| 1               | 1               | 1               | Pig                         | <i>Sus scrofa</i>                 | Mammalia, Artiodactyla             |
| 1               | 1               | 1               | Cow                         | <i>Bos taurus</i>                 | Mammalia, Artiodactyla             |
| 1               | 1               | 0               | Alpaca                      | <i>Vicugna pacos</i>              | Mammalia, Artiodactyla             |
| 1               | 1               | 1               | Dolphin                     | <i>Tursiops truncatus</i>         | Mammalia, Cetacea                  |
| 1               | 1               | 1               | Pika                        | <i>Ochotona princeps</i>          | Mammalia, Lagomorpha               |
| 1               | 1               | 1               | Rabbit                      | <i>Oryctolagus cuniculus</i>      | Mammalia, Lagomorpha               |
| 1               | 1               | 1               | Ground squirrel             | <i>Ictidomys tridecemlineatus</i> | Mammalia, Rodentia                 |
| 1               | 1               | 1               | Guinea pig                  | <i>Cavia porcellus</i>            | Mammalia, Rodentia                 |
| 1               | 1               | 1               | Kangaroo rat                | <i>Dipodomys ordii</i>            | Mammalia, Rodentia                 |
| 1               | 1               | 1               | Rat                         | <i>Rattus norvegicus</i>          | Mammalia, Rodentia                 |
| 1               | 1               | 1               | Mouse                       | <i>Mus musculus</i>               | Mammalia, Rodentia                 |
| 1               | 1               | 1               | Tree shrew                  | <i>Tupaia belangeri</i>           | Mammalia, Scandentia               |
| 1               | 1               | 1               | Bushbaby                    | <i>Otolemur garnettii</i>         | Mammalia, Primates                 |
| 1               | 1               | 1               | Mouse lemur                 | <i>Microcebus murinus</i>         | Mammalia, Primates                 |
| 1               | 1               | 0               | Tarsier                     | <i>Tarsius syrichta</i>           | Mammalia, Primates                 |
| 1               | 1               | 1               | Marmoset                    | <i>Callithrix jacchus</i>         | Mammalia, Primates                 |
| 1               | 1               | 1               | Macaque                     | <i>Macaca mulatta</i>             | Mammalia, Primates                 |
| 1               | 1               | 1               | Gibbon                      | <i>Nomascus leucogenys</i>        | Mammalia, Primates                 |
| 1               | 1               | 1               | Orangutan                   | <i>Pongo abelii</i>               | Mammalia, Primates                 |
| 1               | 1               | 1               | Gorilla                     | <i>Gorilla gorilla</i>            | Mammalia, Primates                 |
| 1               | 1               | 1               | Chimpanzee                  | <i>Pan troglodytes</i>            | Mammalia, Primates                 |
| 1               | 1               | 1               | Human                       | <i>Homo sapiens</i>               | Mammalia, Primates                 |

|                                     |                                                        |
|-------------------------------------|--------------------------------------------------------|
| PI5P4K $\alpha$ (281-305)           | HDVERAEQFEVECEENDGEEEGESD                              |
| Prediction: GOR V                   | CCHHHHHHHHHHHCCCCCCCCCCC                               |
| Prediction: PSIPRED<br>[confidence] | CHHHHHHHHHHHHHCCCCCCCCCCC<br>9566765544212104664225579 |
| PI5P4K $\beta$ (286-310)            | HDVDRAEQEEMEVEERADEDECEND                              |
| Prediction: GOR V                   | CCCCHHHHHHHHHHHHHHHHHHHCC                              |
| Prediction: PSIPRED<br>[confidence] | CHHHHHHHHHHHHHHHHHHHHHCC<br>9036899899999887666766509  |
| PI5P4K $\gamma$ (288-312)           | HDIIRGSEPEEEAPVREDESEVDGD                              |
| Prediction: GOR V                   | CCCCCCCCCCCCCCCCCCCCCCCC                               |
| Prediction: PSIPRED<br>[confidence] | CCCCCCCCCCCCCCCCCCCCCCCC<br>9643589866458863356422489  |

**Figure S6 Prediction of secondary structure for the NLS regions of PI5P4K isoforms**

Amino acid numbers are given in parentheses. Secondary structure prediction was performed by two separate methods, GOR V and PSIPRED v3.2 [4,5] with reported prediction accuracies ( $Q_3$ ) of 73.5% and 81.6% respectively. Prediction lettering follows the Dictionary of Protein Secondary Structure (DSSP) format; H, 4-turn helix ( $\alpha$ -helix); C, coil. Confidence is an arbitrary value 0–9 for the PSIPRED prediction.

## REFERENCES

- 1 Rao, V. D., Misra, S., Boronenkov, I. V., Anderson, R. A. and Hurley, J. H. (1998) Structure of type II $\beta$  phosphatidylinositol phosphate kinase: a protein kinase fold flattened for interfacial phosphorylation. *Cell* **94**, 829–839
- 2 Hedges, S. B., Dudley, J. and Kumar, S. (2006) TimeTree: a public knowledge-base of divergence times among organisms. *Bioinformatics* **22**, 2971–2972
- 3 Larkin, M. A., Blackshields, G., Brown, N. P., Chenna, R., McGettigan, P. A., McWilliam, H., Valentin, F., Wallace, I. M., Wilm, A., Lopez, R. et al. (2007) Clustal W and Clustal X version 2.0. *Bioinformatics* **23**, 2947–2948
- 4 Buchan, D. W., Ward, S. M., Lobley, A. E., Nugent, T. C., Bryson, K. and Jones, D. T. (2010) Protein annotation and modelling servers at University College London. *Nucleic Acids Res.* **38**, W563–W568
- 5 Jones, D. T. (1999) Protein secondary structure prediction based on position-specific scoring matrices. *J. Mol. Biol.* **292**, 195–202

Received 8 April 2013/7 June 2013; accepted 12 June 2013

Published as BJ Immediate Publication 12 June 2013, doi:10.1042/BJ20130488
